# Supplementary material
Source: MDPI journal article supplement (https://www.mdpi.com/1424-8247/17/1/134)
Supplement: s1 [file s1]

**Table S6.** Results from t-test analysis for p53 complexes.

| T-test                                     |                    |
|--------------------------------------------|--------------------|
| Unpaired t test                            |                    |
| P value                                    | <0.0001            |
| P value summary                            | ****               |
| Significantly different (P < 0.05)?        | Yes                |
| One- or two-tailed P value?                | Two-tailed         |
| t, df                                      | t=139.0, df=3600   |
| Mean of column A p53 + 1b                  | -47.37             |
| Mean of column B p53 + 2a                  | -27.3              |
| Difference between means (B - A) $\pm$ SEM | 20.06 $\pm$ 0.1443 |
| 95% confidence interval                    | 19.78 to 20.34     |
| R squared (eta squared)                    | 0.8429             |
| F, DFn, Dfd                                | 1.859, 1800, 1800  |
| P value                                    | <0.0001            |
| P value summary                            | ****               |
| Significantly different (P < 0.05)?        | Yes                |
| Sample size, column A                      | 1801               |
| Sample size, column B                      | 1801               |
