# Supplementary material
Source: MDPI journal article supplement (https://www.mdpi.com/1424-8247/17/1/134)
Supplement: s1 [file s1]

**Table S3.** Major phytocompounds identified in GC-MS profiling of n-hexane extracts of roots (NR) of *P. nepalensis*.

| Sl. No | Compounds                                                                   | Chemical formula                                               | SMILES format                                                                    | PubChem ID | 2D Structures                                                                         |
|--------|-----------------------------------------------------------------------------|----------------------------------------------------------------|----------------------------------------------------------------------------------|------------|---------------------------------------------------------------------------------------|
| 3a     | Trichloromethyl 9-anthracenecarbodithioate                                  | C <sub>16</sub> H <sub>9</sub> Cl <sub>3</sub> S <sub>2</sub>  | <chem>C1=CC=C2C(=C1)C=C3C=CC=C3C2C(=S)SC(Cl)(Cl)Cl</chem>                        | 613595     | 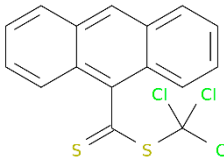   |
| 3b     | Heptane, 3,3-dimethyl-                                                      | C <sub>9</sub> H <sub>20</sub>                                 | <chem>CCCCC(C)(C)CC</chem>                                                       | 520991     |    |
| 3c     | Hexadecane                                                                  | C <sub>16</sub> H <sub>34</sub>                                | <chem>CCCCCCCCCCCCCCCC</chem>                                                    | 11006      |    |
| 3d     | 1,1,1,5,7,7,7-Heptamethyl-3, 3-bis(trimethylsiloxy)tetrasiloxane            | C <sub>13</sub> H <sub>40</sub> O <sub>5</sub> Si <sub>6</sub> | <chem>C[Si](O[Si](C)(C)C)O[Si](O[Si](C)(C)C)O[Si](C)(C)C</chem>                  | 6329081    |    |
| 3e     | Dodecane                                                                    | C <sub>12</sub> H <sub>26</sub>                                | <chem>CCCCCCCCCCCC</chem>                                                        | 8182       |   |
| 3f     | Eicosane                                                                    | C <sub>20</sub> H <sub>42</sub>                                | <chem>CCCCCCCCCCCCCCCCCCCC</chem>                                                | 8222       |  |
| 3g     | 1,1,1,3,5,5,7,7-Nonamethyl-3-(trimethylsiloxy) tetrasiloxane Propanoicacid, | C <sub>12</sub> H <sub>36</sub> O <sub>4</sub> Si <sub>5</sub> | <chem>C[Si](C)(C)O[Si](C)(C)O[Si](C)(C)O[Si](C)(C)O[Si](C)(C)C</chem>            | 8853       |  |
| 3h     | 2-oxo-3-(trimethylsilyl)-, trimethylsilyl ester                             | C <sub>9</sub> H <sub>20</sub> O <sub>3</sub> Si <sub>2</sub>  | <chem>CCOC(=O)C1(CC2C(=C(C(=O)O)C2)[Si](C)(C)C)C1C(=O)OCC</chem>                 | 102119459  |  |
| 3i     | 1,1,1,3,5,7,7,7-Octamethyl-3,5-bis(trimethylsiloxy) tetrasiloxane           | C <sub>14</sub> H <sub>42</sub> O <sub>5</sub> Si <sub>6</sub> | <chem>C[Si](C)(C)O[Si](C)(O[Si](C)(C)C)O[Si](C)(O[Si](C)(C)C)O[Si](C)(C)C</chem> | 553110     |  |
| 3j     | 2,4,6,9-Dehydroadamantane                                                   | C <sub>10</sub> H <sub>12</sub>                                | <chem>C1C2CC3C4C1C5C2C5C34</chem>                                                | 562325     |  |
