# Supplementary material
Source: MDPI journal article supplement (https://www.mdpi.com/1424-8247/17/1/134)
Supplement: s1 [file s1]

**Table S1.** Major phytocompounds identified in GC-MS profiling of methanolic extracts of roots (MR) of *P. nepalensis*

| Sl. No | Compounds                                                        | Chemical formula                                                 | SMILES format                                                   | PubChem ID | 2D Structures                                                                         |
|--------|------------------------------------------------------------------|------------------------------------------------------------------|-----------------------------------------------------------------|------------|---------------------------------------------------------------------------------------|
| 1a     | Tetradecanoic acid, 10,13-dimethyl-, methyl ester                | C <sub>17</sub> H <sub>34</sub> O <sub>2</sub>                   | <chem>CC(C)CCC(C)CCCCCCCCC(=O)OC</chem>                         | 554145     | 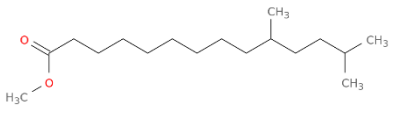   |
| 1b     | Heptadecanoic acid, 16-methyl-, methyl ester                     | C <sub>19</sub> H <sub>38</sub> O <sub>2</sub>                   | <chem>CC(C)CCCCCCCCCCCCCCCCC(=O)OC</chem>                       | 110444     |    |
| 1c     | 1,1,1,5,7,7,7-Heptamethyl-3,3-bis(trimethylsiloxy) tetrasiloxane | C <sub>13</sub> H <sub>40</sub> O <sub>5</sub> Si <sub>6</sub>   | <chem>C[Si](O[Si](C)(C)C)O[Si](O[Si](C)(C)C)O[Si](C)(C)C</chem> | 6329081    |    |
| 1d     | Phthalic acid, butyl hept-4-yl                                   | C <sub>19</sub> H <sub>28</sub> O <sub>4</sub>                   | <chem>CCCCOC(=O)C1=CC=CC=C1C(=O)OC(CCC)CCC</chem>               | 91720764   |   |
| 1e     | 1,1,1,3,5,5,7,7,7-Nonamethyl-3-(trimethylsiloxy) tetrasiloxane   | C <sub>12</sub> H <sub>36</sub> O <sub>4</sub> Si <sub>5</sub>   | <chem>C[Si](C)(C)O[Si](C)(C)O[Si](C)(C)O[Si](C)(C)C</chem>      | 8853       |  |
| 1f     | Norepinephrine, (R)-, 4TMS derivative                            | C <sub>20</sub> H <sub>43</sub> N O <sub>3</sub> Si <sub>4</sub> | <chem>CCOC1=CC=CC=C1O[C@@H]([C@H]2CNCCO2)C3=CC=CC=C3</chem>     | 12751      |  |
| 1g     | 2-Isopropyl-6-phenylnicotinonitrile                              | C <sub>15</sub> H <sub>14</sub> N <sub>2</sub>                   | <chem>CC(C)C1=C(C=CC(=N1)C2=CC=CC=C2)C#N</chem>                 | 610213     |                                                                                       |
