# Supplementary material
Source: MDPI journal article supplement (https://www.mdpi.com/1424-8247/17/1/134)
Supplement: s1 [file s1]

**Table S4.** Major phytocompounds identified in GC-MS profiling of n-hexane extracts of shoots (NS) of *P. nepalensis*

| Sl. No | Compounds                                                                | Chemical formula                                                | SMILES format                                        | PubChem ID | 2D Structures                                                                         |
|--------|--------------------------------------------------------------------------|-----------------------------------------------------------------|------------------------------------------------------|------------|---------------------------------------------------------------------------------------|
| 4a     | Benzene, 1,3,5-tri-tert-butyl-                                           | C <sub>18</sub> H <sub>30</sub>                                 | <chem>CC(C)(C)C1=CC(=CC(=C1)C(C)(C)C)C(C)(C)C</chem> | 15089      | 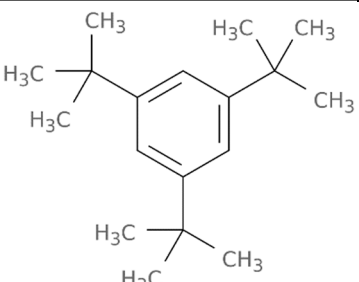   |
| 4b     | 1,1,1,3,5,5,5-Heptamethyltrisiloxane 4H-1-Benzopyran-2-carboxylic acid   | C <sub>7</sub> H <sub>22</sub> O <sub>2</sub> Si <sub>3</sub>   | <chem>C[Si](O[Si](C)(C)C)O[Si](C)(C)C</chem>         | 6327366    |    |
| 4c     | 5-amino-6-hydroxy-4-oxo-, ethyl ester                                    | C <sub>12</sub> H <sub>11</sub> NO <sub>5</sub>                 | <chem>CCOC(=O)C1=CC(=O)C2=C(O1)C=CC(=C2N)O</chem>    | 619354     |   |
| 4d     | 1-Propene, 3-methoxy-                                                    | C <sub>4</sub> H <sub>8</sub> O                                 | <chem>COCC=C</chem>                                  | 69392      |  |
| 4e     | Phthalic acid, butyl hept-4-yl ester                                     | C <sub>19</sub> H <sub>28</sub> O <sub>4</sub>                  | <chem>CCCCOC(=O)C1=CC=CC(=C1C(=O)OC(CCC)CCC</chem>   | 91720764   |  |
| 4f     | Heptane,                                                                 | C <sub>9</sub> H <sub>20</sub>                                  | <chem>CCCCCCC</chem>                                 | 8900       |  |
| 4g     | 3,3-dimethyl-N-(Methyl sulfonyl)-N,O-bis (trimethyl silyl) hydroxylamine | C <sub>7</sub> H <sub>21</sub> NO <sub>3</sub> SSi <sub>2</sub> | <chem>CN([Si](C)(C)C)S(=O)(=O)O[Si](C)(C)C</chem>    | 155620124  |  |
| 4h     | Dodecanoic acid, 2-methyl-                                               | C <sub>13</sub> H <sub>26</sub> O <sub>2</sub>                  | <chem>CCCCCCCCC[C@@H](C)C(=O)O</chem>                | 5312339    |  |

|    |                          |                                                 |                                         |       |                                                                                     |
|----|--------------------------|-------------------------------------------------|-----------------------------------------|-------|-------------------------------------------------------------------------------------|
| 4i | 2-Acetyl-3-ethylpyrazine | C <sub>8</sub> H <sub>10</sub> N <sub>2</sub> O | <chem>CCC1=NC=CN=C1C(=O)C</chem>        | 61918 | 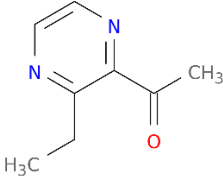 |
| 4j | Eicosane                 | C <sub>20</sub> H <sub>42</sub>                 | <chem>CCCCCCCCCCCCCCCCCCCC</chem><br>CC | 8222  |  |
