# Supplementary material
Source: MDPI journal article supplement (https://www.mdpi.com/1424-8247/17/1/134)
Supplement: s1 [file s1]

**Table S2.** Major phytocompounds identified in GC-MS profiling of methanolic extracts of shoots (MS) of *P. nepalensis*.

| Sl. No | Compounds                                                       | Chemical formula                                               | SMILES format                                                                                | PubChem ID | 2D Structures                                                                         |
|--------|-----------------------------------------------------------------|----------------------------------------------------------------|----------------------------------------------------------------------------------------------|------------|---------------------------------------------------------------------------------------|
| 2a     | Hexadecanoic acid,methyl ester                                  | C <sub>17</sub> H <sub>34</sub> O <sub>2</sub>                 | CCCCCCCCCCCCCCCC(=O)OC                                                                       | 8181       | 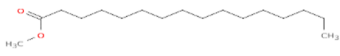   |
| 2b     | 1,1,1,5,7,7,7-Heptamethyl-3,3-bis(trimethylsiloxy)tetrasiloxane | C <sub>13</sub> H <sub>40</sub> O <sub>5</sub> Si <sub>6</sub> | C[Si](O[Si](C)(C)C)O[Si](O[Si](C)(C)C)O[Si](C)(C)C                                           | 6329081    |    |
| 2c     | Oxalic acid, 2TMS derivative                                    | C <sub>8</sub> H <sub>18</sub> O <sub>4</sub> Si <sub>2</sub>  | C[Si](C)(C)OC(=O)C(=O)O[Si](C)(C)C                                                           | 519543     |    |
| 2d     | Cyclooctasiloxane, hexadecamethyl-                              | C <sub>16</sub> H <sub>48</sub> O <sub>8</sub> Si <sub>8</sub> | C[Si]1(O[Si](O[Si](O[Si](O[Si](O[Si](O[Si](O[Si](O[Si](O1)(C)C)(C)C)(C)C)(C)C)(C)C)(C)C)(C)C | 11170      |   |
| 2e     | 3-Ethyl-7-hydroxyphthalide                                      | C <sub>10</sub> H <sub>10</sub> O <sub>3</sub>                 | CCC1C=C(C(=CC=C2)O)C(=O)O1                                                                   | 591119     |  |
| 2f     | Phthalic acid, butyl hex-3-yl ester                             | C <sub>18</sub> H <sub>26</sub> O <sub>4</sub>                 | CCCCOC(=O)C1=CC=CC=C1C(=O)OC(CC)CCC                                                          | 91720282   |  |
| 2g     | 1,1,1,3,5,5,7,7,7-Nonamethyl-3-(trimethylsiloxy)tetrasiloxane   | C <sub>12</sub> H <sub>36</sub> O <sub>4</sub> Si <sub>5</sub> | C[Si](C)(C)O[Si](C)(C)O[Si](C)(O[Si](C)(C)C)C                                                | 553706     |  |

|    |                                             |                                                 |                              |        |                                                                                     |
|----|---------------------------------------------|-------------------------------------------------|------------------------------|--------|-------------------------------------------------------------------------------------|
| 2h | 1-Hexyl-1-nitrocyclohexane                  | C <sub>12</sub> H <sub>23</sub> NO <sub>2</sub> | CCCCCCC1(CCCCC1)[N+](=O)[O-] | 544063 | 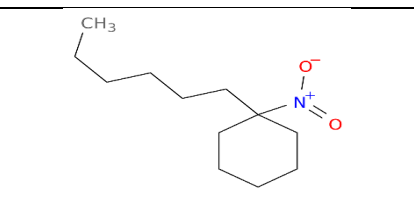 |
| 2i | Isobutyl 4-hydroxybenzoate                  | C <sub>11</sub> H <sub>14</sub> O <sub>3</sub>  | CC(C)COC(=O)C1=CC=C(C=C1)O   | 20240  |  |
| 2j | Octanoic acid, 5-(acetyloxy)-, methyl ester | C <sub>11</sub> H <sub>20</sub> O <sub>4</sub>  | CCCC(CCCC(=O)OC)OC(=O)C      | 539496 |  |
