# Supplementary material
Source: MDPI journal article supplement (https://www.mdpi.com/1424-8247/17/1/134)

**Figure S3.** Root n-hexane extract PCs enrichment analysis, A. Biological process, B. Molecular function, C. Cellular components, D. Pathways, E. Diseases, F. Drugs

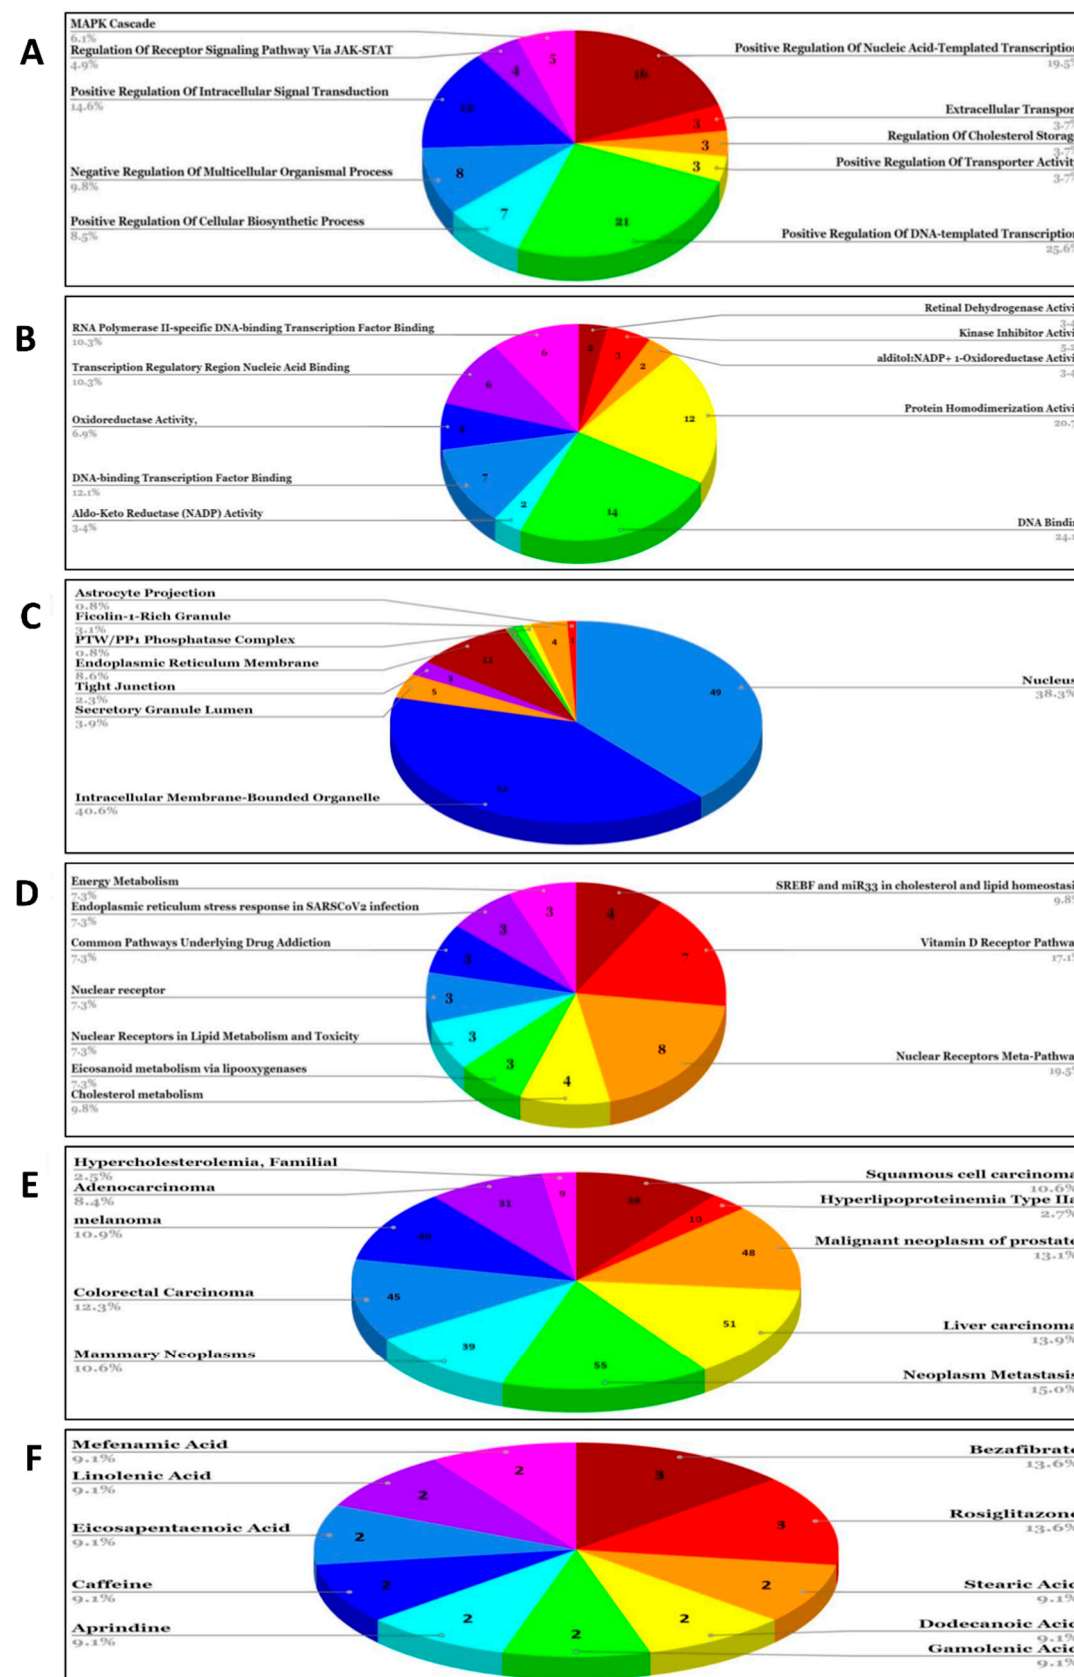

Supplement: s1 [file s1]
