# Supplementary material
Source: MDPI journal article supplement (https://www.mdpi.com/1424-8247/17/1/134)
Supplement: s1 [file s1]

**Table S5.** The binding affinities (B.A.) *kcal/mol* values of TP53, NFKB1, and HSPCB with the PCs of of *p.nepalensis* (1a – 4j)

| TP53  |              |     |              |     |              |     |              |
|-------|--------------|-----|--------------|-----|--------------|-----|--------------|
| PCs   | B.A.         | PCs | B.A.         | PCs | B.A.         | PCs | B.A.         |
| 1a    | -6.1         | 2a  | <b>*-8.0</b> | 3a  | -7.5         | 4a  | -6.4         |
| 1b    | <b>*-8.6</b> | 2b  | -6.3         | 3b  | -5.2         | 4b  | -6.1         |
| 1c    | -6.4         | 2c  | -5.6         | 3c  | -7.2         | 4c  | -7.0         |
| 1d    | -5.0         | 2d  | -3.9         | 3d  | -7.0         | 4d  | -3.8         |
| 1e    | -6.9         | 2e  | -6.2         | 3e  | -7.3         | 4e  | -6.0         |
| 1f    | -6.2         | 2f  | -5.8         | 3f  | -4.2         | 4f  | -5.6         |
| 1g    | -5.8         | 2g  | -6.4         | 3g  | -6.7         | 4g  | -5.4         |
| 1h    | -7.2         | 2h  | -5.9         | 3h  | -6.3         | 4h  | -5.9         |
| 1i    | -6.1         | 2i  | -7.1         | 3i  | -5.9         | 4i  | -4.9         |
| 1j    | -7.8         | 2j  | -5.6         | 3j  | -5.6         | 4j  | -3.9         |
| NFKB1 |              |     |              |     |              |     |              |
| 1a    | -5.2         | 2a  | -5.0         | 3a  | -6.8         | 4a  | -5.3         |
| 1b    | -4.9         | 2b  | -4.4         | 3b  | -4.3         | 4b  | -5.0         |
| 1c    | -4.9         | 2c  | -4.9         | 3c  | -3.8         | 4c  | -6.4         |
| 1d    | -4.9         | 2d  | -4.9         | 3d  | -4.9         | 4d  | -4.9         |
| 1e    | -4.9         | 2e  | -6.5         | 3e  | -4.3         | 4e  | -4.9         |
| 1f    | -5.0         | 2f  | -5.1         | 3f  | -3.8         | 4f  | -3.8         |
| 1g    | -4.4         | 2g  | -4.9         | 3g  | -4.9         | 4g  | -5.0         |
| 1h    | -5.0         | 2h  | -5.0         | 3h  | -4.4         | 4h  | -4.4         |
| 1i    | -4.4         | 2i  | -5.5         | 3i  | -5.0         | 4i  | -4.9         |
| 1j    | -4.0         | 2j  | -4.9         | 3j  | -4.3         | 4j  | -4.9         |
| HSPCB |              |     |              |     |              |     |              |
| 1a    | -6.3         | 2a  | -5.7         | 3a  | <b>*-9.6</b> | 4a  | <b>*-8.7</b> |
| 1b    | -6.3         | 2b  | -6.2         | 3b  | -5.3         | 4b  | -5.6         |
| 1c    | -6.1         | 2c  | -5.2         | 3c  | -6.3         | 4c  | <b>*-8.2</b> |
| 1d    | -7.5         | 2d  | -7.4         | 3d  | -5.3         | 4d  | -3.4         |
| 1e    | -7.2         | 2e  | -7.5         | 3e  | -5.9         | 4e  | -7.8         |
| 1f    | -6.8         | 2f  | -7.7         | 3f  | -6.1         | 4f  | -4.5         |
| 1g    | -5.8         | 2g  | -6.2         | 3g  | -5.8         | 4g  | -6.8         |
| 1h    | -3.4         | 2h  | -4.5         | 3h  | -6.6         | 4h  | -6.4         |
| 1i    | -5.6         | 2i  | -6.6         | 3i  | -7.4         | 4i  | -5.8         |
| 1j    | -6.4         | 2j  | -6.1         | 3j  | -5.9         | 4j  | -5.8         |

\*Higher binding score exhibited ligands
