# Supplementary material
Source: MDPI journal article supplement (https://www.mdpi.com/1424-8247/17/1/134)
Supplement: s1 [file s1]

**Table S7.** Results from One-way ANOVA test for HSPCB complexes.

| One way Anova                     |                 |                         |             |         |                  |
|-----------------------------------|-----------------|-------------------------|-------------|---------|------------------|
| Tukey's multiple comparisons test | Mean Difference | 95.00% CI of Difference | Significant | Summary | Adjusted P-Value |
| HSPCB + 3a vs. HSPCB + 4a         | -1.407          | -1.574 to -1.239        | Yes         | ****    | <0.0001          |
| HSPCB + 3a vs. HSPCB + 4c         | -1.543          | -1.710 to -1.376        | Yes         | ****    | <0.0001          |
| HSPCB + 4a vs. HSPCB + 4c         | -0.1366         | -0.3038 to 0.03071      | No          | ns      | 0.1348           |

ns. Non-significant.
